# Supplementary material for: β-blockers augment L-type Ca2+ channel activity by targeting spatially restricted β2AR signaling in neurons
Source: eLife. 2019 Oct 14;8:e49464. doi: 10.7554/eLife.49464 (PMC6813027; doi:10.7554/eLife.49464)
Supplement: Figure 1—source data 1. [file elife-49464-fig1-data1.xlsx]

## Sheet: fig 1A PKA-p
NT	ISO	TIM	ALP	CAR	ICI	PRO	MET	CGP
1.7793	23.5333	1.6725	16.0297	17.388	2.6635	14.2374	7.17756	15.5188
2.85016	20.7086	3.8138	21.4953	13.8419	3.61824	12.7236	5.04847	15.8999
3.71378	21.2603	3.46505	20.4595	16.6841	4.29087	12.8407	6.79982	10.4859
3.67002	23.5465	3.14608	15.7388	12.944	3.63836	13.1614	8.8613	15.2936

## Sheet: fig 1A GRK-p
NT	ISO	TIM	ALP	CAR	ICI	PRO	MET	CGP
0.544281	94.598	0.497727	0.572968	1.41298	0.596193	0.553216	0.560097	0.664545
2.24959	78.2993	2.42234	2.49295	2.94721	2.64597	3.24279	3.08214	2.61774
1.77297	80.9206	1.92167	3.36619	3.12516	1.87671	2.11498	2.34765	2.55402
3.21726	73.5057	2.33524	3.31869	4.01694	4.01705	4.15393	2.72714	2.7081

## Sheet: fig 1B PKA-p
NT	ISO	TIM	ALP	CAR	ICI	PRO	MET	CGP
2.42673	36.5046	0.681472	22.1261	14.6117	0.784214	4.83723	1.37083	16.6571
2.12744	32.7116	0.717466	27.4004	9.42927	0.926122	11.6462	5.5761	9.46537
0.303424	17.1873	0.154943	22.8262	25.3093	0.183288	9.53577	3.0071	21.4927
2.62846	20.9308	2.15923	17.2405	10.197	1.46928	16.1962	8.9357	20.2428
4.73317	24.9952	1.00228	16.2377	14.3037	1.12928	15.8196	8.58516	13.1939

## Sheet: fig 1B GRK-p
NT	ISO	TIM	ALP	CAR	ICI	PRO	MET	CGP
2.99152	82.2353	2.10553	2.3213	2.62904	1.4565	1.92831	1.99997	2.33257
4.67484	54.2305	5.16053	5.5226	8.47091	5.69695	4.52621	6.54782	5.16968
2.29955	73.2819	0.725761	2.07703	11.9396	2.78586	2.16171	2.88428	1.84434
1.29581	75.7648	0.708238	2.14874	10.134	2.97367	4.06151	1.58728	1.32597
1.72423	83.3475	0.875787	1.74066	3.74839	1.5608	0.730236	3.38441	2.88802

## Sheet: fig 1C PKA-p
NT	ISO w/o ICI	ISO	TIM	ALP	CAR	PRO	MET	CGP
3.96169	52.8136	13.7768	4.23781	4.89957	8.68237	3.81376	3.50232	4.31212
3.26063	56.2983	12.4817	5.47353	5.71754	5.05903	3.06422	5.05775	3.58729
9.88995	46.8609	9.97034	6.28585	5.01959	5.96296	4.83	6.4498	4.73061
1.94329	75.3616	5.97444	2.59489	2.5741	3.5195	2.75622	4.26624	1.00968

## Sheet: fig 1C GRK-p
NT	ISO w/o ICI	ISO	TIM	ALP	CAR	PRO	MET	CGP
3.74026	72.9293	4.48054	2.43402	2.32233	3.26668	4.51828	4.00031	2.30824
2.38285	77.5401	4.33968	4.05009	3.68687	2.78094	2.10431	1.53743	1.57769
3.14394	72.815	3.17974	3.54466	4.27788	2.76604	3.49403	3.62611	3.1526
