# Supplementary material for: β-blockers augment L-type Ca2+ channel activity by targeting spatially restricted β2AR signaling in neurons
Source: eLife. 2019 Oct 14;8:e49464. doi: 10.7554/eLife.49464 (PMC6813027; doi:10.7554/eLife.49464)
Supplement: Figure 2—source data 1. [file elife-49464-fig2-data1.xlsx]

## Sheet: fig 2A PKA-p
NT	TIM 1 uM	ALP 1 nM	ALP 10 nM	ALP 100 nM	ALP 1 uM	ISO 1 uM
1.89519	0.596933	9.4618	19.1138	20.8008	19.4351	28.6964
6.6851	7.09911	6.15011	10.9225	22.5738	26.0622	20.5071
4.22051	2.42894	14.3486	18.0193	17.4083	18.3244	25.2499

## Sheet: fig 2A GRK-p
NT	TIM 1 uM	ALP 1 nM	ALP 10 nM	ALP 100 nM	ALP 1 uM	ISO 1 uM
2.96433	2.71413	2.88677	2.96835	2.8404	2.87384	82.7522
2.91802	1.99651	2.67797	2.50514	2.49517	2.83776	84.5694
1.16088	1.30803	1.35325	1.48526	1.16456	1.42396	92.1041

## Sheet: fig 2B PKA-p
NT	TIM 1 uM	CAR 1 nM	CAR 10 nM	CAR 100 nM	CAR 1 uM	ISO 1 uM
6.70447	6.66315	13.7652	15.4979	15.3707	18.0521	23.9464
8.14479	3.08258	5.7037	10.3504	11.5969	19.9527	41.169
2.97039	2.18494	13.6665	17.5183	16.6871	19.2521	27.7207
1.77797	0.478191	13.2083	14.5754	15.9358	24.064	29.9603

## Sheet: fig 2B GRK-p
NT	TIM 1 uM	CAR 1 nM	CAR 10 nM	CAR 100 nM	CAR 1 uM	ISO 1 uM
1.10433	0.835933	2.48463	3.24907	2.1034	1.96695	88.2557
1.69915	2.15326	1.93325	2.84478	1.58796	2.07625	87.7053
0.56315	0.67577	2.52074	3.80312	8.04739	10.0772	74.3126
1.33789	1.63947	1.35996	1.72082	2.88188	5.71997	85.34

## Sheet: fig 2C PKA-p
NT	ISO	ICI + ISO	ALP	ICI + ALP	CAR	ICI + CAR
4.03824	29.7972	1.27367	39.2665	1.27442	23.2469	1.10307
2.0437	28.8961	1.86905	38.8753	2.16307	24.6638	1.48893
3.38565	32.1134	1.80845	36.1431	2.74881	22.8475	0.953176
1.96857	40.4101	0.715194	33.1266	1.57235	21.4817	0.725398

## Sheet: fig 2C GRK-p
NT	ISO	ICI + ISO	ALP	ICI + ALP	CAR	ICI + CAR
3.34795	75.3591	3.40248	2.69455	5.76225	2.77061	6.66304
0.683794	93.8398	1.43494	1.27429	1.00678	1.12494	0.635459
7.69957	58.9456	6.84167	7.58577	6.82303	5.60992	6.49438
4.35151	67.862	5.57973	4.88651	5.24243	5.98899	6.08877

## Sheet: fig 2D PKA-p
NT	ISO	H89 + ISO	ALP	H89 + ALP	CAR	H89 + CAR
0.934509	30.8314	3.98634	27.4452	2.75415	31.4049	2.64349
5.54338	26.2644	4.4249	35.2055	3.1715	22.9749	2.41536
2.92644	30.7998	1.86846	28.834	5.09272	21.2058	9.2729

## Sheet: fig 2D GRK-p
NT	ISO	H89 + ISO	ALP	H89 + ALP	CAR	H89 + CAR
1.24123	48.3685	45.167	1.52362	1.84108	1.04353	0.815024
2.85654	42.1011	42.3526	3.04848	3.31771	2.77589	3.54763
1.0672	47.1846	46.5603	1.3732	0.951334	1.07576	1.78758
