# Supplementary material for: β-blockers augment L-type Ca2+ channel activity by targeting spatially restricted β2AR signaling in neurons
Source: eLife. 2019 Oct 14;8:e49464. doi: 10.7554/eLife.49464 (PMC6813027; doi:10.7554/eLife.49464)
Supplement: Figure 3—source data 1. [file elife-49464-fig3-data1.xlsx]

## Sheet: fig 3A
Mock	NT	ISO	ALP	CAR	TIM
0	12.375	137.5	54.2857	40	9.33333
0	2	114.286	58	58.5714	6.66667
0.285714	1.28571	104	40	19.8	5.85714
0	7.625	110	58	25.7143	13.75
0	1.55556	61.6667	81.6667	31.6667	1.42857
0.333333	3.09091	43	58.3333	21.4286	3.4
0.5	7.5	143.333	39.5	48.75	3.875
1.2	3.5	91.3333	25	18.6667	5.77778
0.333333	3.14286	63.4	61.1667	41.1111	0.8
0.4	12.2857	71.6667	22.3333	55	6.6
0.666667	6.16667	115	63	33	12.1667
2.5	4	135	88	36.6	2.5
1.75	3.5	61	68	40.3333	4.5
1	0	44.6667	54.6667	49	5
0.25	7.25	65.8333	28	47.75	1.71429
	8.4	122.5	46.25	72.75	1.875
			81.3333	50.5	6
				45.6667	3.33333

## Sheet: fig 3B
ISO	ALP	CAR	ICI	TIM	PRO	MET	CGP
0.180402	-0.000209212	-0.00957203	-0.00754201	-0.000148535	-0.004058	-0.010304	-0.00163031
0.25055	-0.00285673	-0.01115	-0.00720298	-0.001598	0.00936568	-0.00558495	-0.00132227
0.228463	-0.00372004	-0.025797	-0.00131595	-0.010951	-0.00119567	3.17097e-05	-0.00148547
0.241048	-0.00229025	0.00274289	-0.00856197	-0.000501037	-0.00101078	-0.00398696	-0.00444901
0.21432	-0.00229275	-0.008111	-0.00116527	-0.00121605	-0.00122297	-0.017508	-0.013247
0.196872	-0.013945	-0.00843203	-0.00122964	-0.00120854	-0.007725	-0.013451	-0.00637603
0.159879	-0.00916302	-0.011308	-0.00868797	-0.00406694	-0.00416195	-0.011133	-0.00112975
0.206647	-0.00185645	0.00649113	-0.006634	-0.00257504	-0.018062	-0.019632	-0.00167894
0.215603	-0.00147235	0.00190902	-0.020775	-0.00141561	0.00142938	-0.00383401	-0.00114405
0.206688	-0.000207067	0.00287688	-0.00982201	-0.00115502	-0.00162077	-0.00129926	-0.00443006
0.211284	-0.014161	0.00233209	-0.000113368	-0.00104809	-0.0012449	0.00136161	-0.008829
0.239298	-0.00238931	-0.025395	-0.00331199	-0.00659502	-0.00252867	-0.00184441	-0.00112367
0.185663	-0.01958	-0.00117397	-0.011845	-0.00843799	-0.00857496	-0.00178754	-0.00102806
0.161427	-0.000127435	0.00182402	-0.00170004	5.04851e-05	-0.0188349		-0.00699699
0.135293	-0.000207067	0.000185072	-0.00352204	-0.00196898	-0.00159311		-0.00819504
0.126303	-0.005198	-0.014554	0.0165548	-0.000217318	-0.00158465		-0.00199294
0.173025		0.00228632	-0.00327742	-0.00296497			-0.00138569
0.128026		-0.00153696	-0.00335395	-0.000198007			-0.00132763
0.111985		-0.014259	-0.00251591	-0.00832498			-0.00834894
0.137731		-0.007985		-0.00223601			-0.00132954
0.113361		-0.00215495					-0.00157309
0.112579		0.0101849					-0.00874805
0.125751		-0.00217295					-3.14713e-05
0.132167		-0.00358701
0.11577		-0.012283
0.104601		-0.00721097
0.108763
0.15639
0.189329
0.101
0.123415
0.118187
0.145096
0.19395
0.101315
0.140178
0.147956
0.106979
0.0951889
0.121405
0.14806
0.169157

## Sheet: fig 3C
NT	ISO	ALP	CAR	TIM	ICI	PRO	MET	CGP
0.00456411	0.275118	0.060599	0.0286273	-0.00329495	-0.00427997	0.0208544	-0.00509298	0.0342348
-0.011507	0.280177	0.056796	0.0309767	-0.0162131	-0.01113	-0.011263	0.000939488	0.0418335
-0.013055	0.26579	0.0485553	0.0488693	-0.00377798	-0.00524294	0.0147752	-0.010092	0.0577149
-0.00433004	0.27461	0.0551733	0.0434107	-0.00987005	-0.00584304	0.0132972	-0.009637	0.0320175
-0.029115	0.228841	0.0317328	0.0666726	-0.00528204	-0.0203919	0.01555	-0.00732398	0.0252312
0.0082913	0.185672	0.0476931	0.0442566	0.00563902	-0.024299	-0.007604	-0.029228	0.0493029
-0.00710905	0.271344	0.046432	0.0851709	-0.00450206	0.00743657	0.0278735	-0.016495	0.0553536
-0.016805	0.278641	0.0557692	0.0667562	-0.00948596	-0.023503	0.0066694	-0.015259	0.0553715
-0.00999796	0.222203	0.0523087	0.061597	-0.00246894	-0.00985098	0.0244432	-0.00589502	0.0278346
-0.03412	0.274775	0.0219091	0.0508626	-0.01684	-0.018209	0.0110038	-0.00742698	0.042596
0.0106657	0.414845	0.0177506	0.0640628	-0.0106829	-0.01773	0.0030576	-0.00972903	0.0529993
-0.00369299	0.403664	0.0493899	0.0535448	-0.021789		0.0019294	-0.000661969	0.0326431
0.00957239	0.255076	0.0393535	0.0505509	-0.00190496		0.0083313	-0.005463	0.0428562
-0.00103104	0.242826	0.0112648	0.0465586	-0.00942004			-0.047275	0.0276734
0.0104895	0.222701	0.0643649	0.00422108	-0.00343597			0.00471538	0.0099926
0.0109587	0.291457	0.0614221	0.00576383	0.00877058			-0.00803196	0.0304801
0.0126586	0.290817	0.0698618	-0.034009	-0.012255				0.0895581
0.00863743	0.421734	0.121672	-0.015726	0.00966477				0.0521465
0.0137311	0.258225	0.0730923	-0.012794	-0.016502				0.016431
-0.036441	0.167477	0.053212	-0.00793195	0.00133097				0.106077
-0.031601	0.187763	0.0700877	0.00292349	0.0034523				0.0326948
-0.03089	0.207433	0.116991	-0.000779033	-0.017138				0.00475478
-0.00965798	0.149769	0.0647361	0.0232458	-0.012502				0.0572072
-0.032553	0.265563	0.0519164	0.00183868	-0.00883496				0.0374204
-0.030532	0.231876	0.074492	0.00810409	-0.00290096				0.00527871
-0.038657	0.240433	0.0485122	0.00932062	-0.00648701				0.00428379
-0.031108	0.210083	0.037321	0.0117376					0.0182127
-0.014744	0.146753	0.0251451	0.027584					0.00390422
0.000514626	0.230103	0.0374456	0.0295034					0.0668591
	0.198549	0.0214376	-0.012866					0.0349804
	0.319093	0.0317835	0.0309601					0.0730558
		0.0312529	0.0130801					0.0486304
		0.0433444	0.0313445					0.0606828
		0.0313395	0.0122169					0.0602025
			0.0198941					0.0402486
			0.011456					0.048085
			0.0149967					0.0337271
			0.0164507					0.0286327
			0.0174569					0.0496894
			0.0205812					0.0310683
			0.0152793					0.050188
			0.0178711					0.0273464
			-0.00691295					0.015922
			0.0486281					0.0191835
			-0.00751305					0.0216885
			0.0503175					0.0442774
			0.0562246					0.0608019
			0.044426					0.0309504
			0.0504686
			0.0438991
			0.0516988
			0.0327222
			0.0273079
			0.029534
			0.0378389
			0.0172257
			0.0395727
			0.0749841
			0.0344377
			0.0574713
			0.0432739
			0.0272418
			0.044789

## Sheet: fig 3D
ISO	ALP	CAR	TIM	ICI	CGP	PRO	MET
0.342641	0.292148	0.0924753	0.00656521	-0.011953	-0.000213027	-0.026646	-0.023034
0.328217	0.289942	0.06688	0.00827169	-0.00569469	0.00967938	-0.00509703	-0.00426805
0.34743	0.218511	0.0285802	0.0244254	-0.0301103	-0.01633	0.011614	-0.026202
0.290698	0.307851	0.0268229	0.00915438	-0.0340818	-0.00139296	-0.019662	-0.004565
0.328998	0.318249	0.229044	-0.00191998	-0.0270386	0.00193489	-0.012863	-0.01652
0.247651	0.347247	0.16263	-0.00150299	0.000261903	0.010358	-0.000851989	-0.00059998
0.234087	0.20279	0.267096	-0.00318503	-0.00609511	-0.00529098	-0.00639296	-0.035158
0.295515	0.173168	0.178478		-0.00690806	0.0271578	0.0083819	-0.00325406
0.342192	0.126554	0.129993		0.000972629	0.00398427	-0.042768	-0.014641
0.31053	0.208867	0.209491		0.0236132	0.0307649	-0.017744	-0.00562894
0.361967	0.179059	0.263908		0.0156073	0.0131522	0.00234741	-0.00241196
0.334208	0.305566	0.262697		-0.0087375		-0.00589895	0.00131279
0.301689	0.235757	0.163248		0.007734		0.00130498
0.300544	0.221553	0.161672		-0.00866717		0.00910181
0.208868	0.275826	0.206574		0.0107722		-0.027701
	0.275023	0.086592		-0.0263087
	0.163923	0.127459		-0.00558305
	0.243877	0.0941625		-0.0109946
	0.157081	0.232393		0.00256318
	0.140646	0.161133		-0.007195
	0.118212	0.104041
	0.286309	0.117474
	0.168263	0.10449
	0.191676	0.0905828
	0.202349	0.082976
	0.129749
	0.105579
	0.283286
	0.28478
	0.313803

## Sheet: fig 3E
ISO -6	ISO -9	ALP -6	ALP -9	CAR -6	CAR -9	ALP + ICI	CAR + ICI	ALP + ddA	CAR + ddA
0.342641	0.121396	0.292148	0.0838774	0.0924753	0.128548	-0.011706	-0.012455	0.00120223	0.0150827
0.328217	0.0838237	0.289942	0.108366	0.06688	0.0765462	-0.0173351	-0.00756204	-0.00369406	0.00409007
0.34743	0.171466	0.218511	0.130823	0.0285802	0.0630286	-0.019806	0.00685078	0.0114644	-0.00529802
0.290698	0.21738	0.307851	0.0279413	0.0268229	0.0689553	-0.00663495	-0.0116071	0.0030762	0.0119932
0.328998	0.173966	0.318249	0.0305259	0.229044	0.0542558	-0.02001	-0.00100994	-0.00188303	0.0229635
0.247651	0.231241	0.347247	0.110533	0.16263	0.0612453	-0.019048	-0.02245	0.00484651	0.0145992
0.234087	0.223029	0.20279	0.0882429	0.267096	0.0308236	-0.017512	-0.025614	0.0157949	0.00570732
0.295515	0.210363	0.173168	0.207066	0.178478	0.0377976	-0.02239	-0.014694	-0.00679398	0.0080409
0.342192	0.219029	0.126554	0.180312	0.129993	0.0295213	-0.023479	-0.018374	-0.00191402	0.00577748
0.31053	0.16853	0.202684	0.117501	0.209491	0.00855231	-0.0134799	-0.00194597	0.00238389	2.5928e-05
0.361967	0.187398	0.179059	0.0408733	0.263908	0.0629831		-0.017283	0.00805622	0.00877422
0.29144	0.209003	0.305566	0.174497	0.262697	0.0341106		0.0139138	0.00222719	0.000695527
0.301689	0.06608	0.235757	0.15457	0.163248	0.0421098		-0.00822103	0.000950098	0.000909686
0.300544	0.131418	0.221553	0.0486163	0.161672	0.0321091		0.000691712	-0.011425	0.00411022
0.208868	0.185612	0.275826	0.0604772	0.206574	0.0499771		0.00503248	-0.017243	-0.00484705
0.334208	0.173831	0.275023	0.135235	0.086592	0.0619123		-0.000615001	-0.00928795	0.00348401
0.212074	0.140511	0.163923	0.0494341	0.127459	0.0875618		-0.000236034	-0.00604999
0.17535	0.156519	0.243877	0.102307	0.0941625	0.0399066		-0.00114	-0.003919
0.32252	0.181399	0.157081	0.146981	0.232393	0.0383564		0.00238591	-0.01059
0.342238	0.128336	0.140646	0.174387	0.161133	0.0299264		0.0035798	0.0108178
0.395375	0.0735151	0.118212	0.0936415	0.104041	0.0420389		-0.00240302	0.002271
0.19735	0.0584153	0.139326	0.202279	0.117474	0.0417044		0.00213331	-0.010681
0.345293	0.0266505	0.168263	0.0264915	0.10449	0.0961527			-0.00382197
0.335675	0.0639055	0.191676		0.0905828	0.0388546			0.00226778
0.344462	0.121664	0.202349		0.082976	0.0298103			-0.00317597
0.272299	0.0400018	0.129749			0.0585623			0.00590861
0.208643	0.138506	0.105579			0.0334589
0.34651	0.101875	0.283286			0.06458
0.312122	0.127411	0.28478			0.0541516
0.353502		0.313803			0.195569
0.364276		0.286309			0.169519
0.205889		0.208867			0.119663
0.345996		0.0930219			0.154401
		0.266569			0.034028
		0.298651			0.0229822
		0.201656			0.0365352
		0.312187			0.1057
		0.273242			0.0367777
					0.0313838
					0.0361795
					0.0283889
					0.0301775
					0.0414391
					0.102718
					0.0152496
					0.0143698
					0.0605774
					0.0367211
					0.0359923
					0.0227735
					0.0198603
					0.0777054
					0.0582306
					0.0136816
					0.0162669
					0.0230391
					0.0156429
					0.0269962
