# Supplementary material for: β-blockers augment L-type Ca2+ channel activity by targeting spatially restricted β2AR signaling in neurons
Source: eLife. 2019 Oct 14;8:e49464. doi: 10.7554/eLife.49464 (PMC6813027; doi:10.7554/eLife.49464)
Supplement: Figure 4—source data 1. [file elife-49464-fig4-data1.xlsx]

## Sheet: fig 4A pS1928
NT	TIM	ALP	CAR	ISO
13.4715	11.6033	24.6603	25.4651	24.7998
10.7139	12.9546	23.7507	25.9146	26.6663
11.0407	11.8394	27.6767	27.1692	22.2739

## Sheet: fig 4A pS1700
NT	TIM	ALP	CAR	ISO
15.5419	15.4901	20.9183	24.5539	23.4958
12.9369	15.5363	29.0357	21.2066	21.2845
16.426	11.5977	24.7843	24.363	22.829

## Sheet: fig 4B pS845
NT	TIM	ALP	CAR	ISO
10.6698	13.9249	16.3084	12.557	46.5399
16.0379	18.566	9.54811	9.72411	46.1238
21.0802	17.4294	18.5578	12.4033	30.5293
6.80031	16.4849	9.85878	8.28871	58.5673

## Sheet: fig 4B pS831
NT	TIM	ALP	CAR	ISO
15.7743	23.5698	23.6139	16.3886	20.6533
23.306	21.0485	22.2599	17.369	16.0165
19.657	16.8896	18.4103	21.5008	23.5422
21.2891	21.1388	22.4631	19.7022	15.4067

## Sheet: fig 4C pS1928
NT	ICI + CAR	ddA + CAR	H89 + CAR	KN93 + CAR	CAR
8.66928	6.42019	10.3609	6.12398	33.7151	34.7106
11.3756	12.5092	12.0311	7.22325	29.3999	27.4609
9.69308	10.9225	12.9374	12.2355	30.1649	24.0467
8.09081	9.25957	8.93305	9.11162	38.5611	26.0438
13.6108	12.932	12.2496	9.88631	27.0868	24.2345

## Sheet: fig 4C pS1700
NT	ICI + CAR	ddA + CAR	H89 + CAR	KN93 + CAR	CAR
10.1291	7.33604	3.71544	9.51519	41.0405	28.2638
16.0876	14.5296	12.095	7.849	25.6485	23.7903
7.90476	11.7587	16.3147	6.02248	35.5536	22.4457
7.59178	8.78038	8.01356	7.5204	42.0181	26.0758
11.5639	10.034	10.9717	9.87602	28.3291	29.2253
