# Supplementary material for: β-blockers augment L-type Ca2+ channel activity by targeting spatially restricted β2AR signaling in neurons
Source: eLife. 2019 Oct 14;8:e49464. doi: 10.7554/eLife.49464 (PMC6813027; doi:10.7554/eLife.49464)
Supplement: Figure 5—source data 1. [file elife-49464-fig5-data1.xlsx]

## Sheet: fig 5C Po
NT	ISO	CAR	CAR_out	TIM
5.43	34	18.47	14.5802	12.55
4.3	19.65	69.58	31.656	1.36
8.31	44.93	1.01	5.2165	0.32
9.16	44.29	35.1	5.8988	3.9
0.48	25.52	21.26	0.0539	0.02
2.59	39.88	47.88	30.0641	36.34
18.52	32.26	54.26	21.2556	22.47
12.34	42.66	15.44	33.8812	7.64
12.38	46.3	69.29	19.0183	0.24
	48.85	5.61	4.3611	24.84
	70.15	7.03	1.2655
		5.56	14.53
		15.66
		11.66
		33.25
		67.64
		39.99
		12.71
		9.75
		30.93
		38.31
		54.76

## Sheet: fig 5D availablity
NT	ISO	CAR	CAR_out	TIM
13.82	70	68.38	52.04	30.01
58.77	65.36	100	33.59	28.23
86	78.31	37.5	33.67	23.84
7.17	78.46	53.58	59.6	45.23
5.89	21.12	65.8	3.56	12
21.49	100	100	62.39	68.93
38.36	65.8	66.87	43.2	49.34
69.85	52.36	58.77	73.54	37.77
51.01	100	60.05	40	6.06
	100	71.72	30.61	82.68
	100	50.51	20.23
		49.49	40.84
		41.32
		48.75
		63.16
		71.23
		100
		61.2
		50.26
		50.34
		53.36
		100

## Sheet: fig 5E current
NT	ISO	CAR	CAR_out	TIM
94.11	322.2	323	202.6	119.1
65.23	180	575.9	202.4	96.11
229.7	282.1	71.28	77.7	36.63
51.31	495.8	379.6	390.3	229.2
20.94	88.69	265.3	14.24	31.55
57.47	428.5	252.9	295.6	225.5
175	303.6	499.1	186.1	249.1
378.7	293.8	345.5	307.1	165.3
205.6	226	103.9	242.4	104.6
	286.9	202.4	92.58	291.748
	480	230.9	25.47
		106.9	235.6
		224.1
		315.2
		396.9
		424.9
		313
		240.5
		262
		339.3
		353.5
		474.2

## Sheet: fig 5F backfill Po
Time (s)	Mean	Upper limit	Lower limit
0	3.21726	4.80988	1.62463
8.9839	4.13529	6.34873	1.92185
17.9678	7.38399	10.2752	4.49283
26.9517	5.43359	7.77483	3.09235
35.9356	2.80404	4.50532	1.10275
44.9195	2.80967	5.02495	0.594392
53.9034	2.77056	3.79853	1.7426
62.8873	7.68194	12.1135	3.25041
71.8712	4.57629	7.03817	2.11442
80.8551	6.12934	9.06389	3.1948
89.839	5.46732	7.95537	2.97926
98.8229	5.90416	9.22857	2.57976
107.807	4.32197	7.35455	1.28939
116.791	6.86156	11.0113	2.71182
125.775	6.16167	8.44068	3.88266
134.758	2.12588	3.07989	1.17187
143.742	5.62771	8.29052	2.9649
152.726	3.43353	5.72063	1.14643
161.71	6.27304	9.43597	3.11012
170.694	9.50429	13.9639	5.04469
179.678	5.04014	7.56195	2.51834
188.662	4.33142	5.80457	2.85826
197.646	6.02487	8.43187	3.61788
206.63	3.66905	5.23191	2.10618
215.614	11.5401	16.2527	6.8275
224.597	6.66858	10.1013	3.23589
233.581	6.66019	9.35761	3.96277
242.565	6.91798	10.0549	3.78105
251.549	6.06292	8.77478	3.35106
260.533	4.39609	6.48157	2.31061
269.517	4.77817	7.16594	2.3904
278.501	5.29848	8.00291	2.59406
287.485	6.29973	9.86104	2.73842
296.469	9.37224	12.6589	6.08556
305.453	7.04765	9.69081	4.4045
314.437	6.06404	8.62925	3.49882
323.42	6.34814	9.36188	3.33439
332.404	8.94653	12.0439	5.84917
341.388	7.15487	10.0832	4.22652
350.372	6.38572	9.64556	3.12587
359.356	5.28166	7.72685	2.83648
368.34	7.56596	10.6191	4.51281
377.324	7.74128	11.5113	3.97125
386.308	7.13366	10.2754	3.99195
395.292	4.8709	7.60746	2.13434
404.276	8.21971	10.9349	5.50448
413.259	6.54934	9.19621	3.90248
422.243	7.71824	11.1265	4.31004
431.227	6.0955	8.56801	3.62299
440.211	7.92703	10.9231	4.93094
449.195	9.05836	13.0291	5.08757
458.179	8.46069	11.5541	5.36732
467.163	4.55416	6.56477	2.54355
476.147	9.35914	12.7314	5.98691
485.131	5.34656	7.29252	3.40059
494.115	4.30724	6.27109	2.34338
503.098	9.11014	13.2966	4.92366
512.082	7.62997	11.2734	3.98658
521.066	8.75377	12.0461	5.46145
530.05	5.18518	7.65021	2.72016
539.034	5.38694	7.77518	2.99871
548.018	4.60565	7.11083	2.10048
557.002	2.22686	3.40558	1.04813
565.986	7.60696	9.88832	5.32559
574.97	3.2204	4.48235	1.95845
583.953	4.91629	6.56348	3.26911
592.937	11.2637	15.6011	6.92629
601.921	8.14796	11.01	5.28592
610.905	5.49918	7.94423	3.05414
619.889	11.2369	14.6888	7.785
628.873	14.089	18.7087	9.46919
637.857	10.4032	14.6637	6.14269
646.841	7.45749	11.6526	3.26235
655.825	4.81139	7.27863	2.34415
664.809	6.70739	9.31398	4.10081
673.793	14.732	19.0082	10.4559
682.776	10.7162	13.9004	7.532
691.76	6.90921	9.66213	4.15629
700.744	6.61199	9.35923	3.86475
709.728	12.1616	15.9949	8.32824
718.712	7.87251	10.1744	5.57058
727.696	5.40263	7.41326	3.39199
736.68	8.24949	11.0793	5.41964
745.664	7.09624	9.95643	4.23606
754.648	3.97791	6.04587	1.90994
763.631	7.3841	10.1321	4.63613
772.615	12.7389	18.1697	7.30821
781.599	9.33531	12.6151	6.05553
790.583	11.7393	16.6109	6.86771
799.567	9.84494	13.4381	6.25184
808.551	10.4565	13.9567	6.95629
817.535	3.24596	4.69946	1.79246
826.519	7.64297	11.2497	4.03626
835.503	11.7562	16.0458	7.46656
844.487	10.075	13.0926	7.05733
853.471	8.78188	11.5979	5.96589
862.454	14.7944	19.5689	10.0199
871.438	11.0498	15.0804	7.01909
880.422	7.85149	10.4733	5.22966
889.406	5.03016	6.7312	3.32912
898.39	8.26467	10.2096	6.31974
907.374	17.6116	24.2693	10.954
916.358	13.1954	16.0949	10.2959
925.342	16.6004	20.3355	12.8653
934.326	21.8879	26.8879	16.8879
943.309	11.2485	13.9007	8.59629
952.293	10.6961	14.2253	7.16687
961.277	9.26764	11.9265	6.60878
970.261	10.0325	13.3868	6.67826
979.245	18.114	24.0596	12.1684
988.229	9.16854	10.5219	7.81523
997.213	10.0533	12.2487	7.85803
1006.2	13.2698	16.1844	10.3553
1015.18	16.6245	20.1155	13.1334
1024.16	13.0527	16.3233	9.78198
1033.15	9.30429	12.5644	6.04419
1042.13	15.3473	18.7442	11.9503
1051.12	19.5296	23.8799	15.1792
1060.1	12.922	17.4248	8.41928
1069.08	15.4379	19.5173	11.3586
1078.07	12.9907	17.0694	8.9119
1087.05	20.0021	25.3922	14.6121
1096.04	12.8695	16.7853	8.95374
1105.02	23.2528	29.3762	17.1294
1114	13.9411	17.9993	9.88277
1122.99	14.3753	18.7471	10.0035
1131.97	17.7916	22.9152	12.6679
1140.95	18.831	24.2972	13.3649
1149.94	16.3117	20.792	11.8314
1158.92	11.7171	15.0336	8.40063
1167.91	14.9756	18.6919	11.2594
1176.89	15.8075	20.2422	11.3728
1185.88	12.4149	15.4375	9.39238
1194.86	17.3292	20.2924	14.3659
1203.84	14.0571	17.6879	10.4263
1212.83	9.57464	11.8598	7.28954
1221.81	12.1265	15.5618	8.69115
1230.79	16.3684	19.1992	13.5375
1239.78	10.1928	12.8974	7.48827
1248.76	13.96	17.5483	10.3716
1257.75	15.8363	19.4299	12.2428
1266.73	21.6323	25.7653	17.4992
1275.71	18.5218	22.8697	14.174
1284.7	17.8126	21.8747	13.7506
1293.68	25.0486	30.4131	19.6841
1302.67	26.2403	30.832	21.6486
1311.65	20.0887	23.7356	16.4417
1320.63	18.5518	23.6342	13.4695
1329.62	7.8642	10.9308	4.79761
1338.6	14.9563	18.4339	11.4786
1347.59	10.2918	14.1962	6.38734
1356.57	8.6997	12.3312	5.06822
1365.55	16.8148	20.2213	13.4082
1374.54	11.5989	14.2569	8.94078
1383.52	4.8024	6.81802	2.78678
1392.51	12.2065	15.7243	8.68874
1401.49	12.1478	15.8072	8.48835
1410.47	4.7911	6.48079	3.10141
1419.46	13.3217	16.8852	9.75819
1428.44	17.1038	20.6823	13.5253
1437.42	14.5335	19.1979	9.86903
1446.41	2.68993	3.65518	1.72467
1455.39	18.3798	24.9604	11.7993
1464.38	17.0328	20.7094	13.3561
1473.36	5.61282	7.56378	3.66187
1482.34	14.28	17.6792	10.8808
1491.33	14.1297	17.0251	11.2343
1500.31	1.35743	2.1356	0.579247
1509.3	10.9133	14.7719	7.05462
1518.28	13.0557	17.3601	8.75129
1527.26	21.3138	25.3229	17.3047
1536.25	13.1198	16.1933	10.0464
1545.23	10.935	13.3446	8.52544
1554.21	9.5578	12.4426	6.67304
1563.2	16.0854	21.7939	10.377
1572.18	10.5376	14.2349	6.84023
1581.17	9.09125	12.4236	5.75886
1590.15	19.5056	25.2237	13.7875
1599.13	15.9864	22.8426	9.13034
1608.12	20.065	23.8429	16.2871
1617.1	14.7891	17.9241	11.6542
1626.09	10.7679	13.6509	7.88493
1635.07	9.0561	12.0092	6.10295
1644.05	12.2179	15.5681	8.86767
1653.04	2.794	4.361	1.227
1662.02	8.12613	11.6675	4.58479
1671.01	20.5166	25.5637	15.4696
1679.99	12.851	16.8243	8.87777
1688.97	19.7261	21.5459	17.9062
1697.96	14.3751	19.5938	9.15643

## Sheet: fig 5G backfill comparison
first 30	last 30
0.93149	1.80148
14.7513	25.6437
4.16486	1.11147
15.4303	22.5609
2.02773	3.71235
1.0955	11.7616
15.3321	15.57
1.80037	0.047017
0.331333	15.3878
1.00019	20.7178
3.24417	5.80555
