# Supplementary material for: β-blockers augment L-type Ca2+ channel activity by targeting spatially restricted β2AR signaling in neurons
Source: eLife. 2019 Oct 14;8:e49464. doi: 10.7554/eLife.49464 (PMC6813027; doi:10.7554/eLife.49464)
Supplement: Figure 6—source data 1. [file elife-49464-fig6-data1.xlsx]

## Sheet: fig 6B ISO
mut iso -5	mut iso -6	mut iso -7	mut iso -8	mut iso -9	mut iso -10	mut iso -11	mut iso -12	wt iso -5	wt iso -6	wt iso -7	wt iso -8	wt iso -9	wt iso -10	wt iso -11	wt iso -12
0.0607334	0.0918468	0.100792	0.00415504	-0.022233	0.007411	0.00109696	0.00626159	0.277843	0.20699	0.160956	0.0882595	0.0593116	0.0332528	-0.00458395	-0.00662398
0.0409009	0.092546	0.00874358	-0.00629199	-0.026088	0.00196695	-0.038137	-0.000154018	0.276549	0.206637	0.189845	0.0597841	0.0503184	0.0341346	-0.00750899	0.0108366
0.10746	0.107115	0.0118713	-0.00325203	0.00944531	-0.03769	0.0286185	0.0117975	0.219897	0.205547	0.188835	0.115545	0.0152909	0.0229651	-0.013551	0.0199268
0.0518902	0.0775405	0.0463388	0.00265318	-0.031253	0.00589871	-0.015107	0.0162001	0.288921	0.195418	0.195026	0.111915	0.0224043	0.0181234	-0.00966895	-0.016343
0.0564571	0.0274234	-0.021221	-0.00983095	0.0200855		-0.036215	-0.0135371	0.234775	0.227559	0.175414	0.086993	0.00766498	0.0171323	0.0029757	0.000230789
0.0651755	0.112683	0.0222936	-0.0332	-0.020326		0.039361	-0.022011	0.283207	0.326055	0.181263	0.105345	0.040666	0.0204752	0.00645798	-0.01381
0.0915137	0.0848254	0.0111866	-0.025944	-0.034638		-0.011493		0.220472	0.272691	0.182691	0.0946091	0.0478298	0.0488632	0.0019111	0.0081802
0.065794	0.0814313	0.0039137	0.040424	0.00203711		-0.03062		0.283528	0.231718	0.175656	0.0731839	0.045336	0.0295336	0.0298768
0.0731622	0.0810043	-0.00133097	0.010351	-0.0179321				0.272964	0.189265	0.24309	0.101805	0.0483308	0.0365793	-0.00219405
0.0590446	0.0451275	-0.013435	0.00629604	-0.000242949				0.230334	0.245	0.230263	0.0705972	0.0488608	0.0352929	0.0231473
0.070089	0.0698197	0.0114413	0.014145	-0.00162494				0.258005	0.244506	0.24066	0.0806229	0.0451342	0.0361867
0.0600913	0.0637943	0.0019893	-0.013399	0.008659				0.220471	0.186685	0.213394	0.0879459	0.0498896	0.0422931
0.0690243	0.0516411	0.00780678	0.0154982	-0.0166219				0.243772	0.196039	0.204735	0.088965	0.0597897	0.0464635
0.0682487	0.159762	0.0417097	-0.00738394	-0.010447				0.23215	0.309281	0.218653	0.0618573	0.0481342	0.0628567
	0.159537	0.0352184	0.000100017	0.000612497				0.254846	0.192571	0.192612	0.0669848	0.0494484	0.0130765
	0.159737	-0.00793803	0.0338366	-0.00536799					0.271861	0.226549	0.0580109	0.0728158	0.00108868
	0.052979	-0.046562	0.0119138	-0.0283199					0.291466	0.208787	0.0812492	0.0430959	0.0287917
	0.030126	0.0222138	-0.00642204	0.00131929					0.329391	0.247708	0.0578899	0.0645138	0.0219043
	0.0252353	-0.012851	0.00420594	0.00519443					0.271742	0.207195	0.101824	0.0329685	0.0290527
	0.0249735	-0.027109	0.00358713	0.0245647					0.299145	0.226748	0.095508	0.10627	0.00395232
	0.0278581	0.00104618	0.0408469						0.335027	0.213449	0.0978084	0.0580485	0.013038
	0.0305654	-0.00268102	-0.02531								0.0977802	0.0916014	0.005436
	0.0277327	0.00249583	-0.028719								0.0785689	0.0238538	0.0373936
	0.0311964	0.000325024	-0.01062								0.0695419	0.0425825
	0.0634845	0.0332426	-0.00506401								0.0690306
	0.0725173	0.00714648	-0.022012								0.082062
	0.0573491		0.00262308
	0.0323255		0.0135699
			0.0103232

## Sheet: fig 6B CAR
mut car -5	mut car -6	mut car -7	mut car -8	mut car -9	mut car -10	mut car -11	mut car -12	wt car -5	wt car -6	wt car -7	wt car -8	wt car -9	wt car -10	wt car -11	wt car -12
0.182495	0.201065	0.119236	0.0482965	0.0334462	0.0331274	0.00706601	0.00339258	0.144894	0.172079	0.10317	0.039027	0.046491	0.0655258	-0.00509095	0.00967705
0.181911	0.187488	0.106222	0.0439309	0.0169758	0.00740951	0.00401789	-0.017483	0.1591	0.195999	0.109247	0.0339838	0.0331715	0.0677082	-0.015553	0.020764
0.185348	0.167252	0.102783	0.0340198	0.024681	0.0110657	0.00654328	-0.00143194	0.149593	0.171702	0.10992	0.0489498	0.049337	0.0830139	-0.00723004	0.00613612
0.175716	0.193262	0.0988885	0.025359	0.0432599	0.0164682	0.00262338	0.023116	0.312453	0.182513	0.0435968	0.0365612	0.00485951	0.0032385	0.0197226	-0.0146
0.194179	0.21538	0.102848	0.0514485		0.0253299		-0.00875795	0.340276	0.170258	0.10344	0.0228413		-0.032254	0.00284952	-0.019694
0.15843	0.179546	0.109779	0.0579593		-0.01157		-0.01371	0.139774	0.16185	0.0604622	0.0435474		0.00374448	-0.000365973	0.0149831
0.2055	0.17694	0.104759	0.0246468		-0.00155902		0.024284	0.132168	0.174278	0.145195	0.0310866		0.000794172	0.0140897
0.150363	0.185168	0.0827821	0.052642		-0.021302		-0.016041	0.121802	0.225652	0.105387	0.04188		0.00519341	-0.00401294
0.16379	0.14088	0.0999297	0.055766		0.0366039		0.00530148	0.14605	0.204484	0.108533	0.044139		-0.021711	0.0304909
0.220424	0.25943	0.0955364	0.0481069		0.020032		0.016099	0.309086	0.237927	0.203043	0.0652556
0.165356	0.186887	0.0968226	0.0447783		0.037995		0.033517		0.230812	0.081526	0.0498529
0.214328	0.184226	0.0868133	0.0193855						0.232526	0.0704356	0.0529364
	0.200744	0.0887682	0.0311585							0.0581736	0.0453067
	0.180273	0.0948775								0.0908492	0.0398223
	0.158047	0.0613748								0.0580381	0.0689081
	0.150666	0.107019								0.079078	0.0473673
	0.149697	0.0942771								0.0583978
		0.0860735								0.150477
		0.0941724								0.141063
		0.083956								0.0761165
		0.0881168								0.0739895
		0.0760003								0.059114
		0.110342								0.111795

## Sheet: fig 6C
	WT							DREADD
NT	1	1	1	1	1	1	1	1	1	1	1	1	1	1
-10	5.82688	5.39053	7.75297	5.39081	2.82076	5.8401	7.64621	1.09927	1.29991	1.05884	0.776109	1.11512	1.00617	0.87816
-9	5.34314	5.54624	7.61736	7.87149	3.65818	8.48756	9.44779	0.968225	1.00845	0.919108	0.641858	0.966027	1.09892	1.09674
-8	5.22983	5.83669	10.1458	11.181	5.01705	9.94733	9.83352	1.07666	1.40428	0.993673	1.01569	1.2098	1.65426	1.05379
-7	6.35825	5.75069	9.89565	12.7035	6.44415	9.95395	10.6604	1.21325	2.30179	1.50808	1.57306	1.89532	2.72971	3.63795
-6	7.68969	6.78893	9.74296	12.4123	5.77409	9.86812	10.3224	1.93098	4.37954	2.45376	3.29761	3.23653	5.72471	6.65419

## Sheet: fig 6D
	WT					DREADD
NT	1	1	1	1	1	1	1	1	1	1
-10	5.21893	5.19581	4.7633	8.03821	5.94593	4.17808	4.94559	4.29233	6.02976	4.78348
-9	4.21492	6.28932	4.7661	9.02361	6.37523	4.57645	3.90906	4.44933	6.80844	4.77841
-8	4.63692	5.74104	5.32238	9.0682	6.37825	5.8989	5.1056	5.14422	6.17474	5.4766
-7	4.33019	4.44264	4.81786	9.19134	6.54533	5.74807	6.94053	6.14811	7.68683	5.68876
-6	4.44351	4.90689	5.07696	7.87265	7.19857	6.15743	6.90083	7.12611	7.80086	6.76228
