# Supplementary material for: β-blockers augment L-type Ca2+ channel activity by targeting spatially restricted β2AR signaling in neurons
Source: eLife. 2019 Oct 14;8:e49464. doi: 10.7554/eLife.49464 (PMC6813027; doi:10.7554/eLife.49464)
Supplement: Figure 7—source data 1. [file elife-49464-fig7-data1.xlsx]

## Sheet: fig 7E Po
mutant	mutant + ISO	mutant + CAR
10.82	28.95	41.51
19.82	4.3	6.54
20.05	0.06	3.72
21.22	3.48	11.3
20.19	1.19	15.17
0.01	0.7	43.4
5.47	27.39	39.46
1.25	0.96	42.83
1.07	15.04	17.27
0.01	16.3	20.42
0.01	14.84	3.87
19.83		49.19
		2.03
		52.7
		28.06
		12.88
		36.25
		51.06

## Sheet: fig 7F availablity
mutant	mutant + ISO	mutant + CAR
38.02	55.28	53.99
75.51	48.82	74.47
45.23	6.19	47.72
60.26	37.55	57.57
31.23	35.19	61.27
3	36.75	75.51
48.04	44.34	100
63.41	11.48	90.53
4.74	41.1	59.8
8	45.34	51.01
1.7	37	40.75
74.74		55.13
		31.44
		68.93
		62.39
		50
		56.91
		100

## Sheet: fig 7G current
mutant	mutant + ISO	mutant + CAR
192.2	356.7	448
316.3	123.8	439.8
157.9	12.95	322.4
139.5	177.4	507.2
287.2	74.64	422.9
12.44	73.27	581
302.5	234.5	522.8
271.5	43.14	963.3
23.36	81.02	396.4
13.86	276	383.4
7.165	279.6	223.4
364.9		508.4
		160.4
		370.9
		395.4
		259.5
		272.6
		328.2
